# Supplementary material for: Progesterone increases blood glucose via hepatic progesterone receptor membrane component 1 under limited or impaired action of insulin
Source: PubMed Central journal article supplement (PMC7529793; doi:10.1038/s41598-020-73330-7), 2020-10-01

## **Supplementary material**

### **Progesterone increases blood glucose via hepatic progesterone receptor membrane component 1 under limited or impaired action of insulin**

**Sang R. Lee<sup>1</sup>, Woo-Young Choi<sup>1</sup>, Jun H. Heo<sup>1</sup>, Jiyoung Huh<sup>1</sup>, Globinna Kim<sup>2</sup>, Kyu-Pil Lee<sup>1</sup>, Hyo-Jung Kwun<sup>1</sup>, Hyun-Jin Shin<sup>1</sup>, In-Jeoung Baek<sup>2</sup>, and Eui-Ju Hong<sup>1\*</sup>**

<sup>1</sup>College of Veterinary Medicine, Chungnam National University, Daejeon 34134, Republic of Korea;

<sup>2</sup>Department of Convergence Medicine, University of Ulsan College of Medicine, Asan Medical Center, Seoul 05505, Republic of Korea

\* Address correspondence to: Eui-ju Hong, College of Veterinary Medicine, 99Daehak-ro, Suite 401 Veterinary medicine Bldg., Yuseong, Daejeon 34134, Korea. Phone: +82-42-821-6781; Fax: +82-42-821-8903 Email: ejhong@cnu.ac.kr

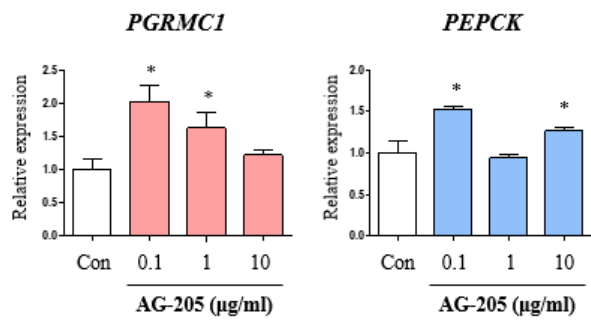

Fig S1. mRNA expression of *PGRMC1* and *PEPCK* in Hep3B cells AG-205 (0.1, 1, 10 µg/ml) was treated in low glucose medium (50mg/dl) for 18 h in Hep3B cells. *RPLP0* was used as an internal control. Values represent means  $\pm$  SD. \*,  $p < 0.05$  vs. Control. All experiments were repeated at least 3 times.

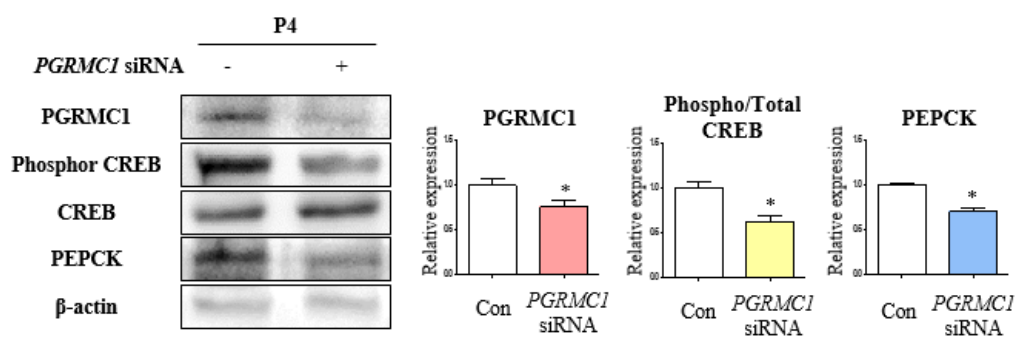

Fig S2. Western blot analysis and quantification of *PGRMC1*, phosphor/total CREB, and PEPCK in control and *PGRMC1* siRNA groups. Cells were starved in low glucose medium (50 mg/dl). P4 (10 nM) was treated for 18 h after siRNA transfection.  $\beta$ -actin was used as an internal control. Values represent means  $\pm$  SD. \*,  $p < 0.05$  vs. Control. All experiments were repeated at least 3 times.

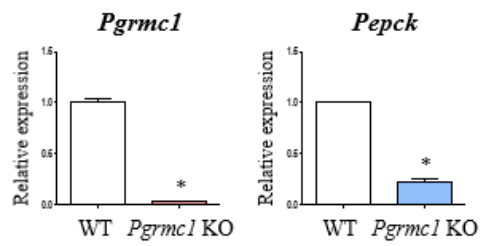

Fig S3. mRNA expression of *Pgrmc1* and *Pepck* in WT and *Pgrmc1* KO hepatocyte. Cells were incubated in low glucose medium (50mg/dl) for 18 h in Hep3B cells. *Rplp0* was used as an internal control. Values represent means  $\pm$  SD. \*,  $p < 0.05$  vs. WT hepatocyte. All experiments were repeated at least 3 times.

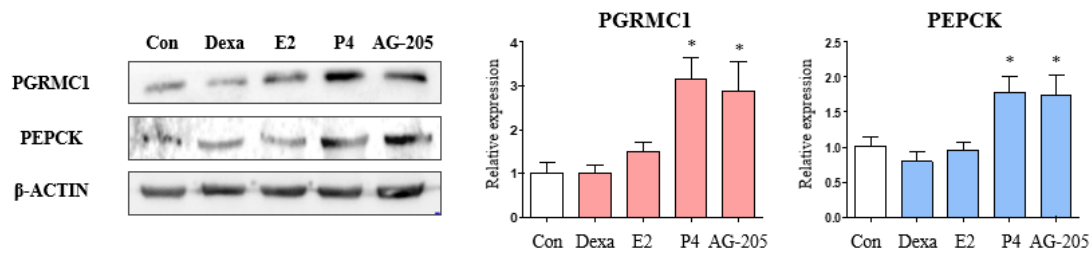

Fig S4. Western blot analysis and quantification of PGRMC1 and PEPCK in Control vs. Dexamethasone, E2, P4, AG-205 groups. Cells were starved in DMEM medium (w/o glucose, w/o FBS). Dexamethasone (100 nM), E2 (100 nM), P4 (100 nM) and AG-205 (10  $\mu$ g/ml) were treated in DMEM medium (w/o glucose, 2%CD-FBS, 1% Penicillin/Streptomycin, 1nM dexamethasone) for 24 h.  $\beta$ -actin was used as an internal control. Values represent means  $\pm$  SD. \*,  $p < 0.05$  vs. Control. All experiments were repeated at least 3 times.

**Fig.1A**

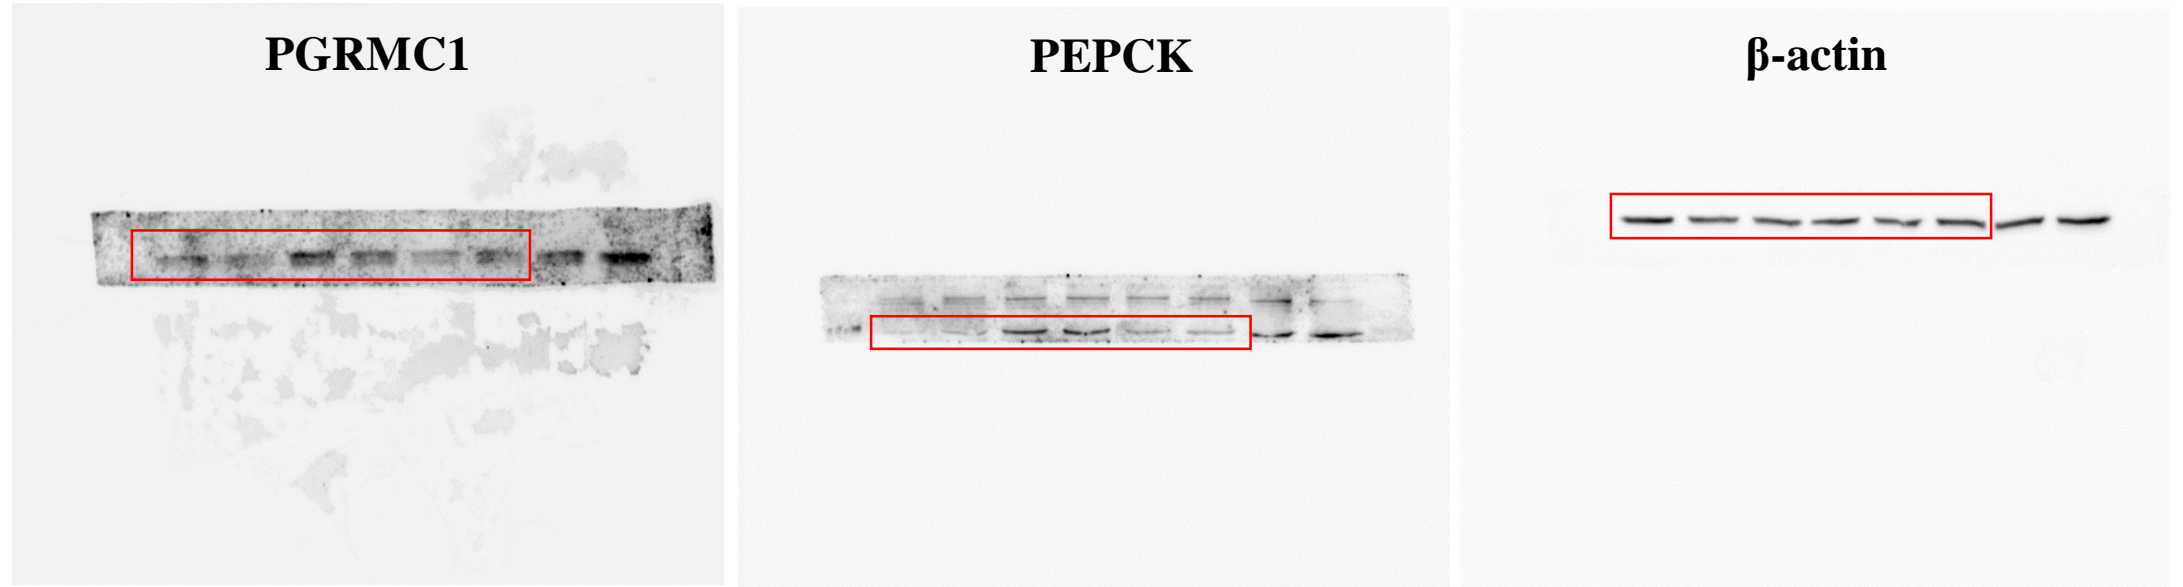

**Fig.1B**

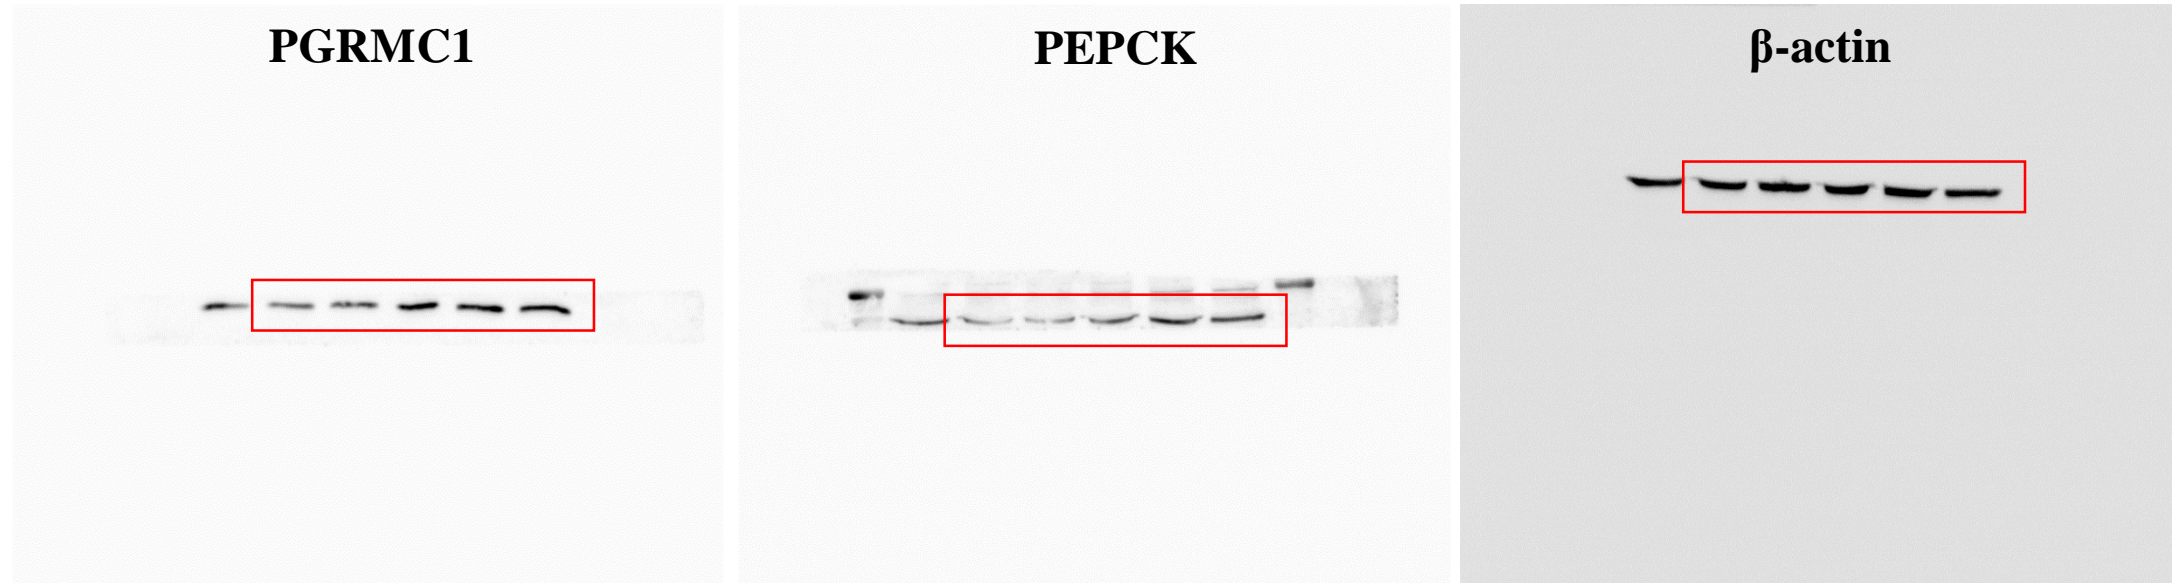



**Fig.1D**

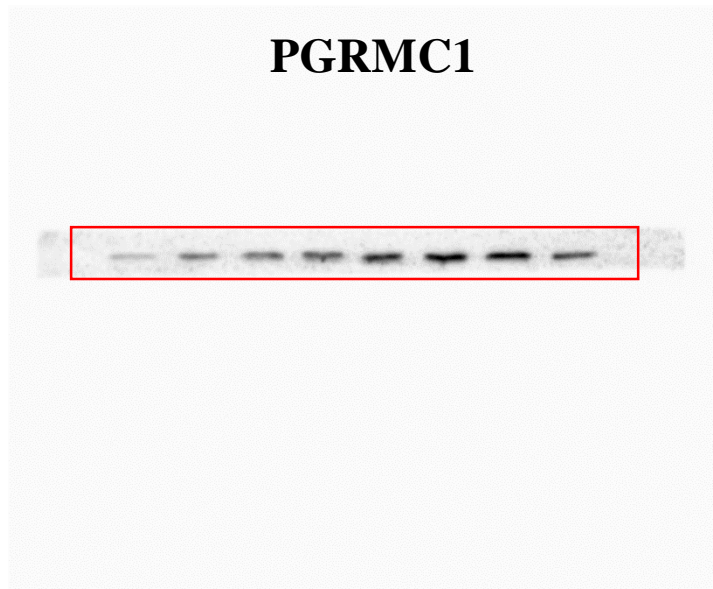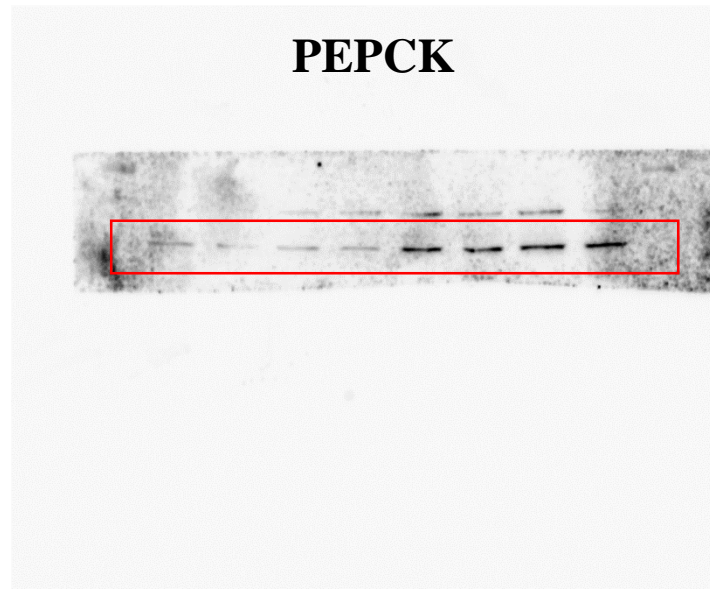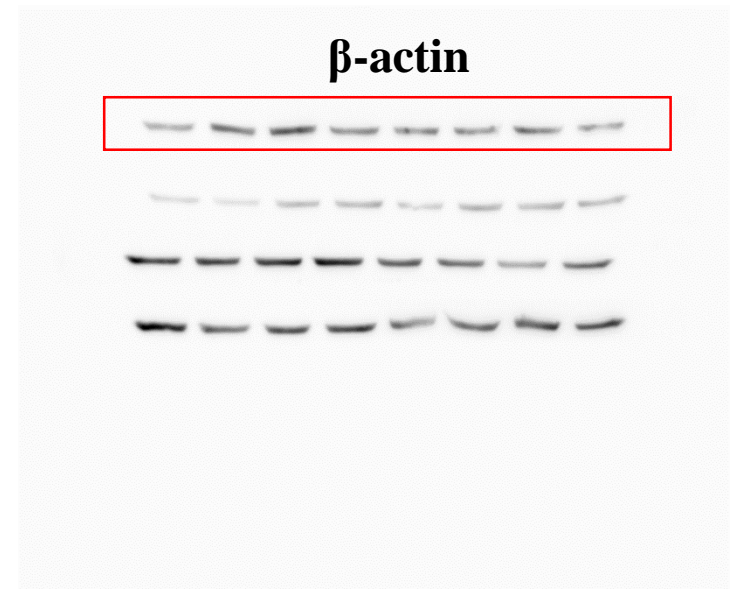

**Fig.2A**

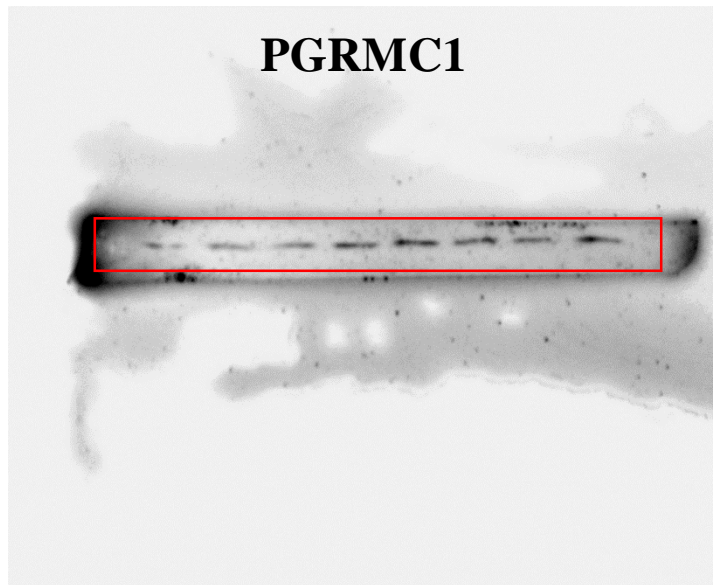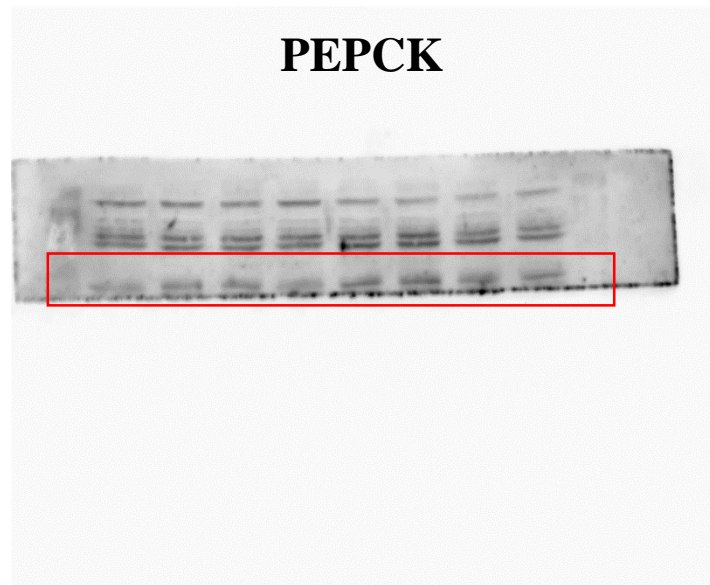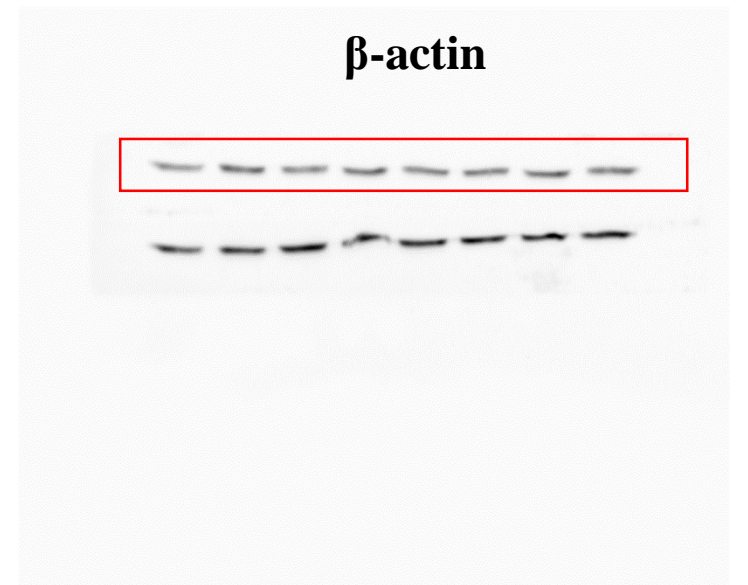

**Fig.3A**

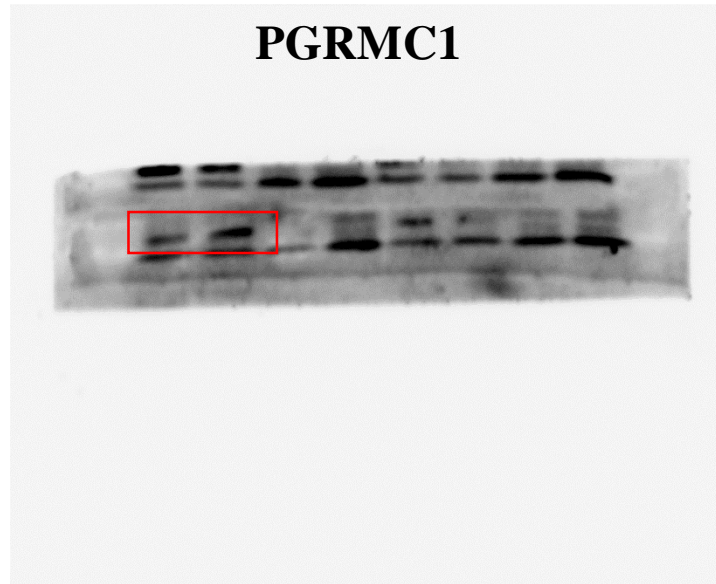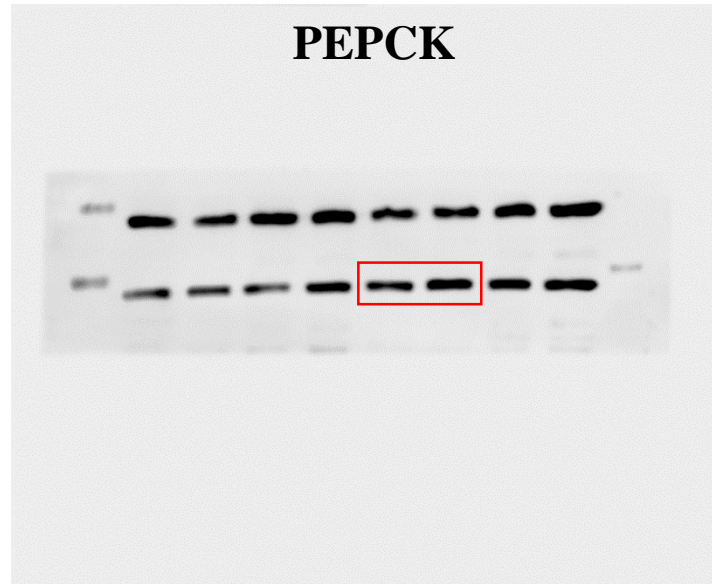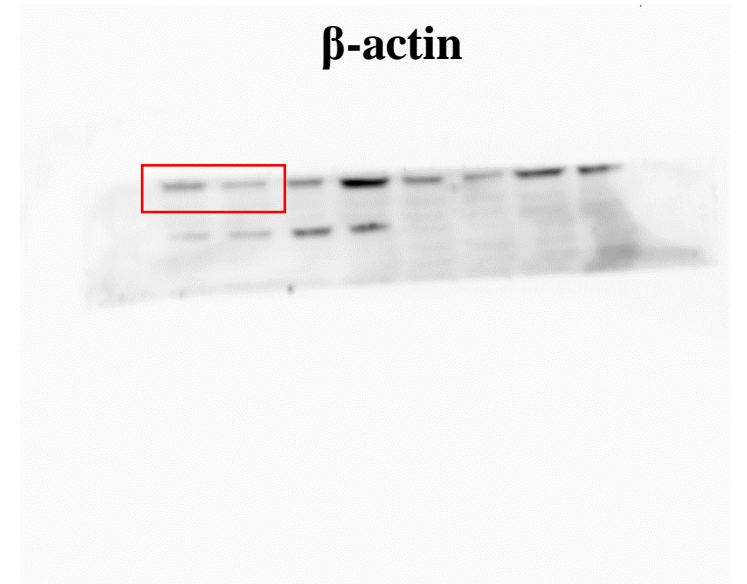

**Fig.3B**

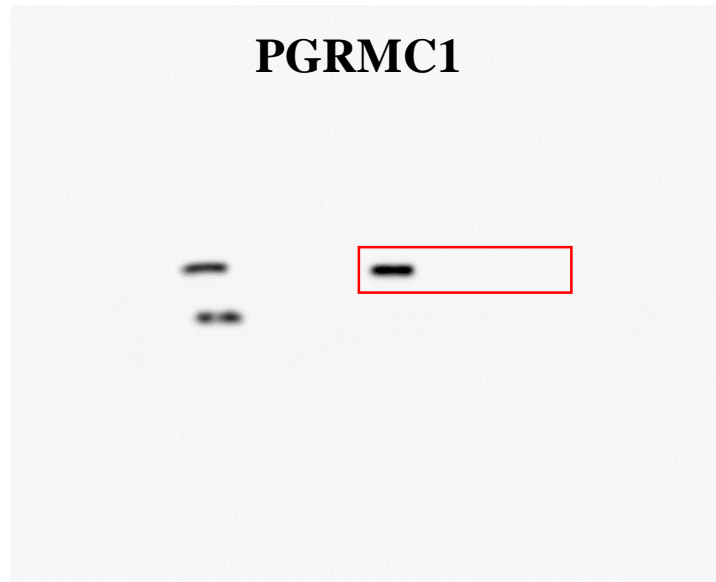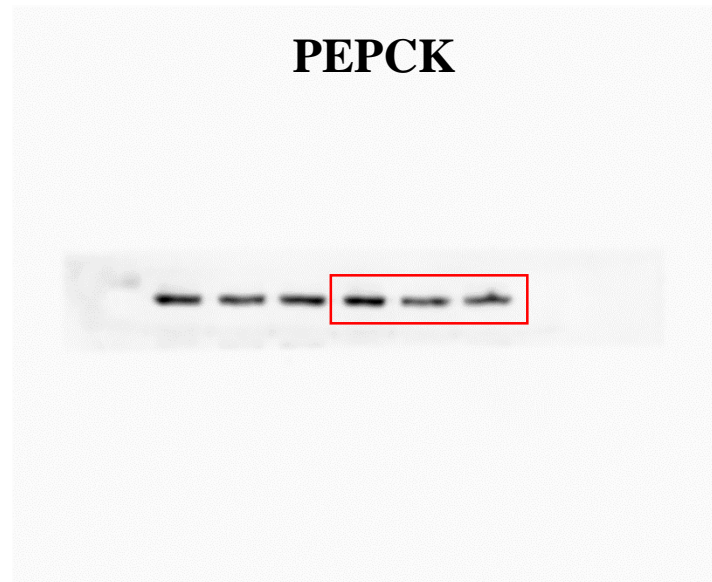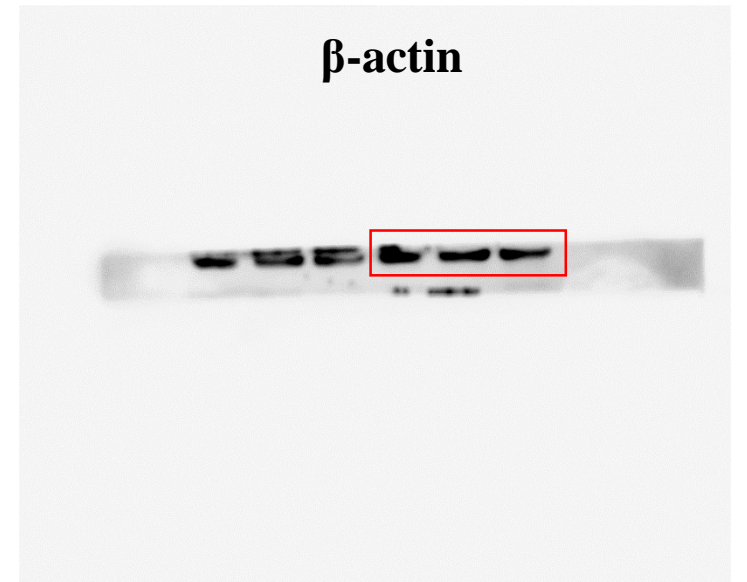



**Fig.3C**

**PGRMC1**

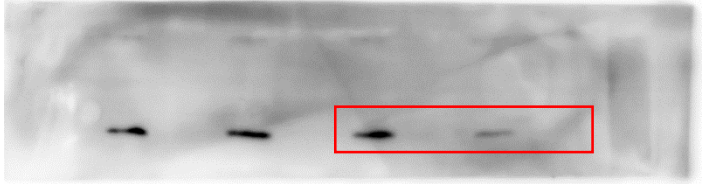

**PEPCK**

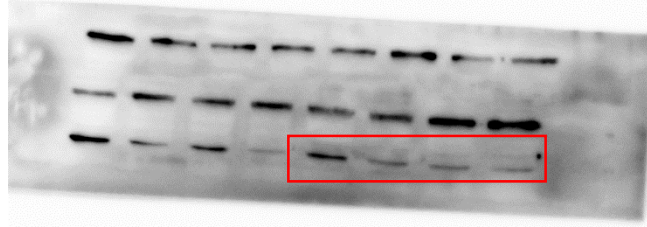

**ACTIN**

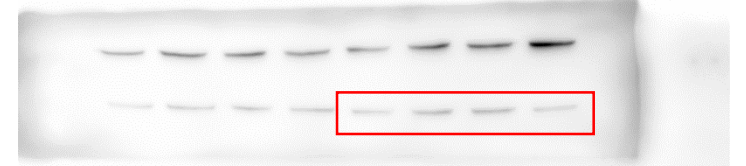

**Fig.4A**

**PGRMC1**

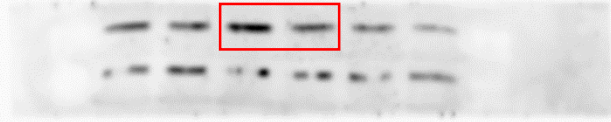

**PEPCK**

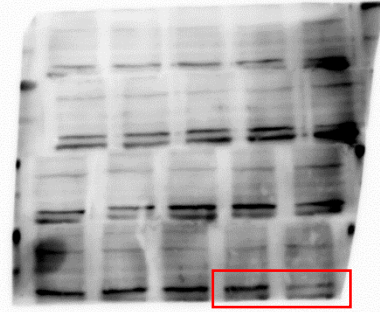

**$\beta$ -actin**

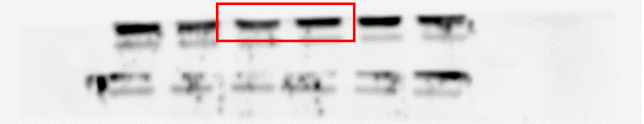

**CREB**

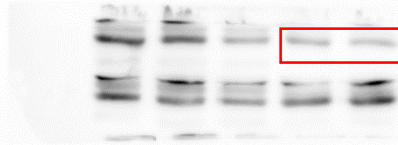

**Phosphor CREB**

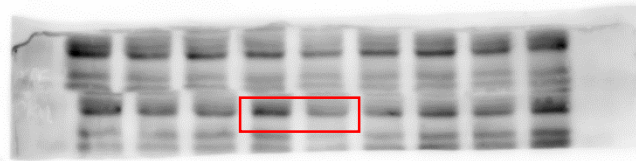

**Fig.4B**

**PGRMC1**

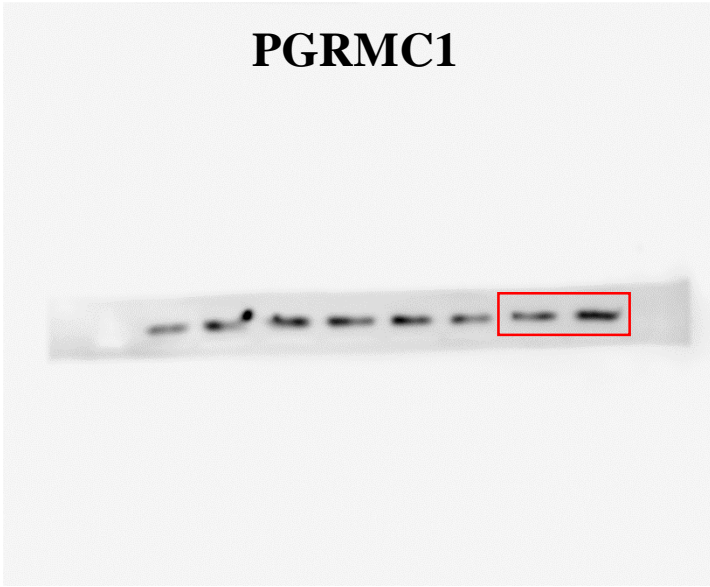

**PEPCK**

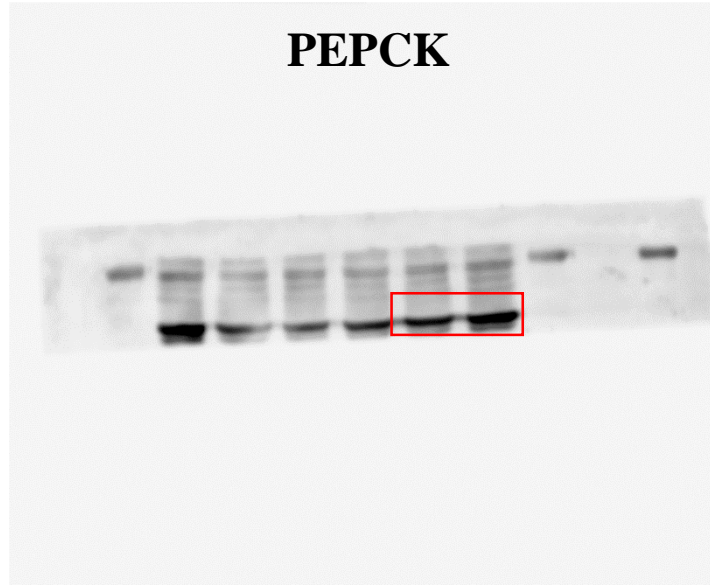

**$\beta$ -actin**

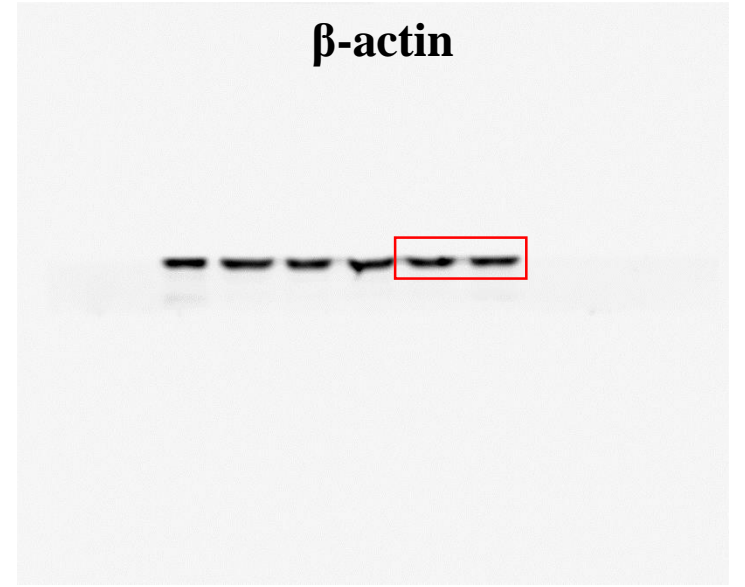

**CREB**

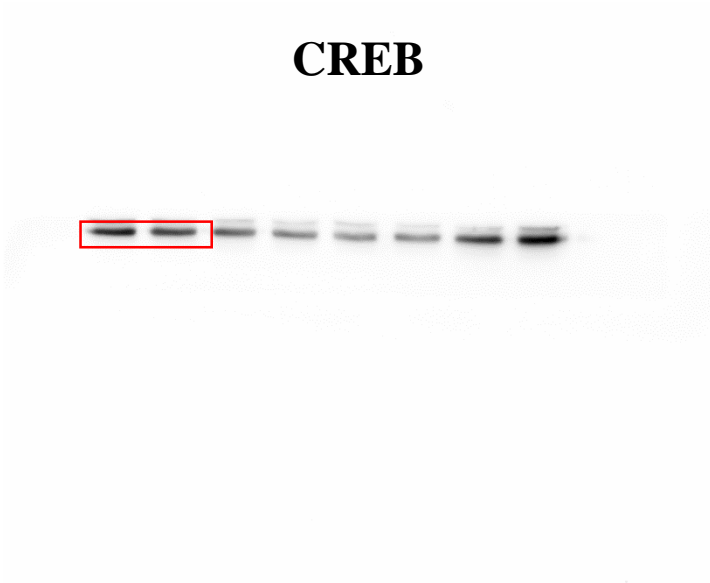

**Phosphor CREB**

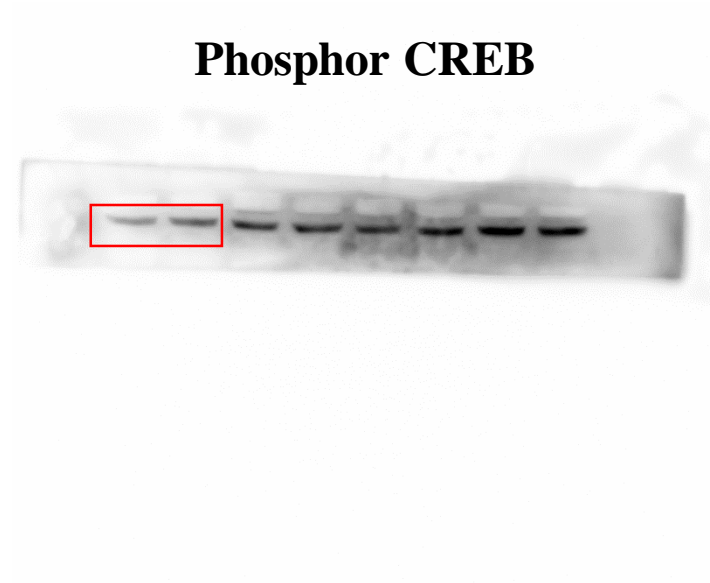



**Fig.4C**

**PGRMC1**

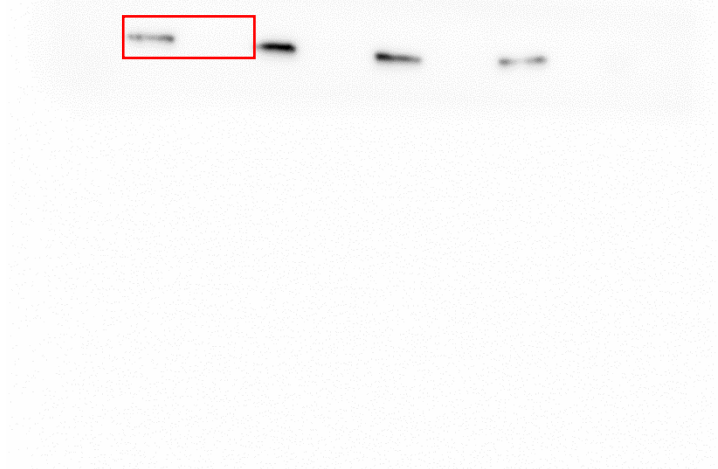

**PEPCK**

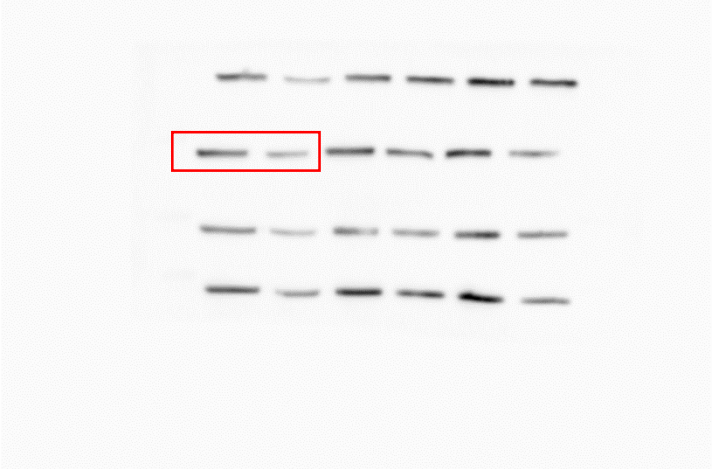

**$\beta$ -actin**

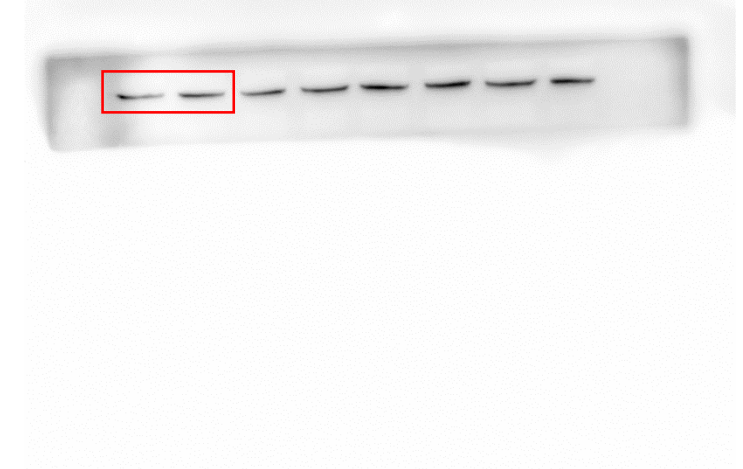

**CREB**

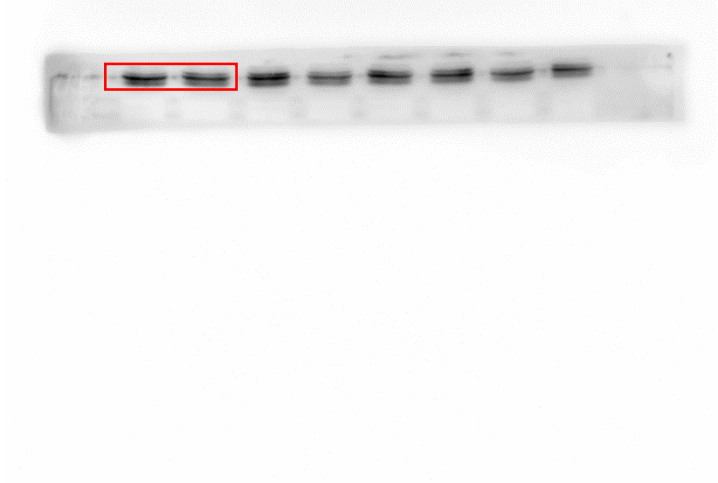

**Phosphor CREB**

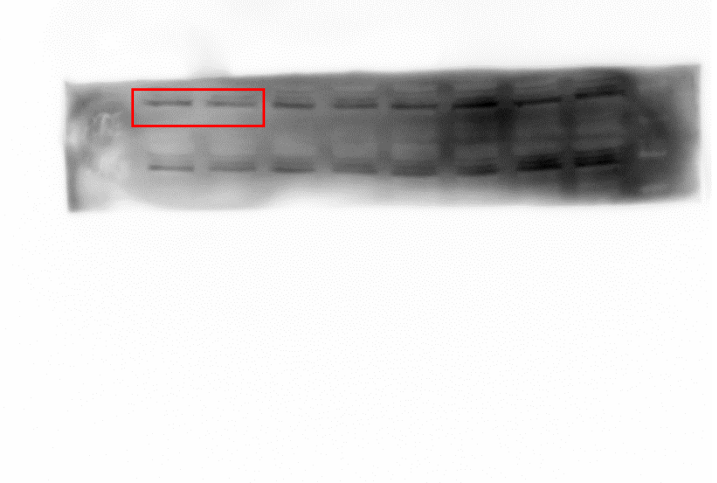

**Fig.5A**

**PGRMC1**

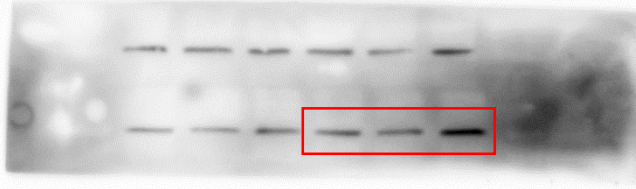

**PEPCK**

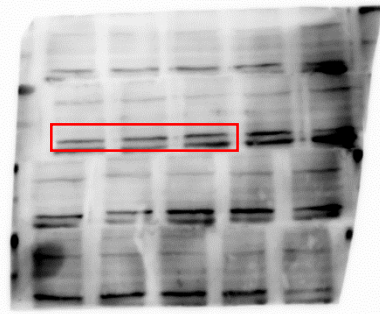

**$\beta$ -actin**

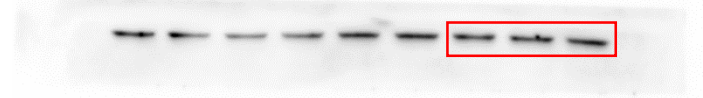

**Fig.5C**

**PGRMC1**

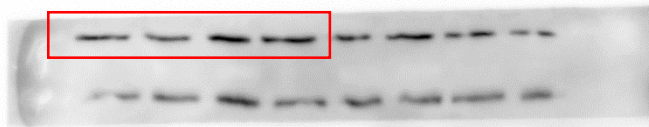

**PEPCK**

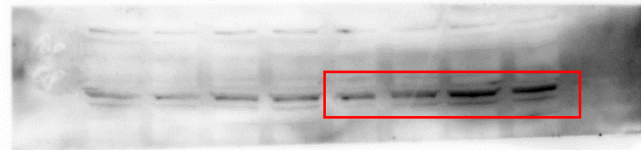

**$\beta$ -actin**

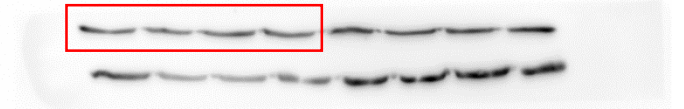



**Fig.6A**

**PGRMC1**

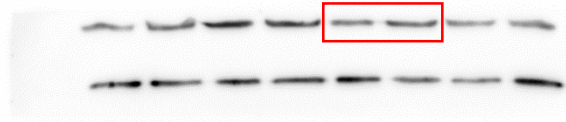

**PEPCK**

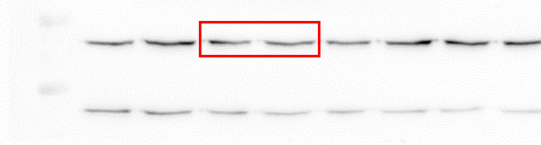

**$\beta$ -actin**

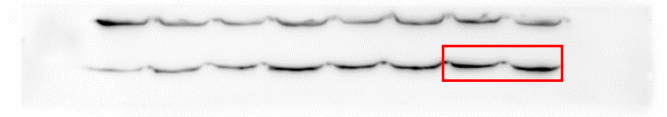

**CREB**

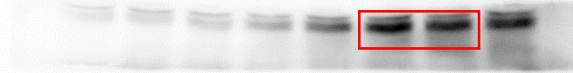

**Phosphor CREB**

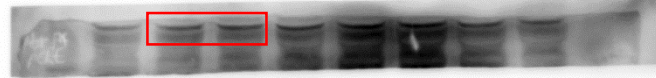

**Fig.6B**

**PGRMC1**

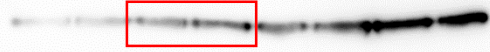

**PEPCK**

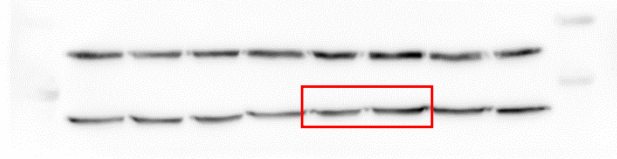

**$\beta$ -actin**

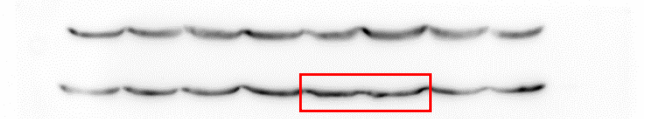

**CREB**

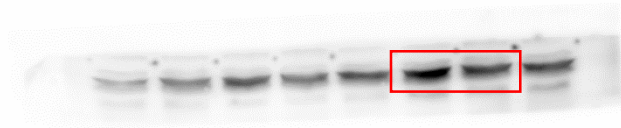

**Phosphor CREB**

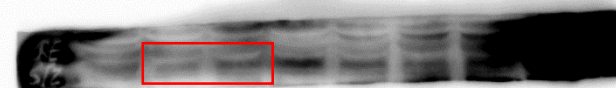

**Fig.6C**

**PGRMC1**

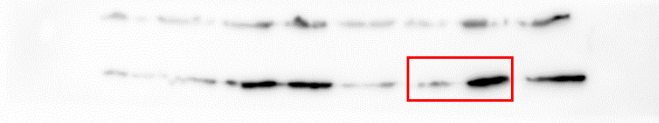

**PEPCK**

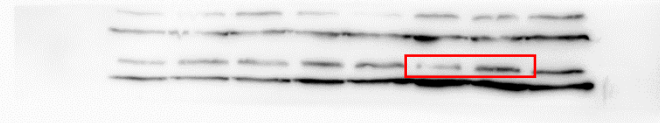

**$\beta$ -actin**

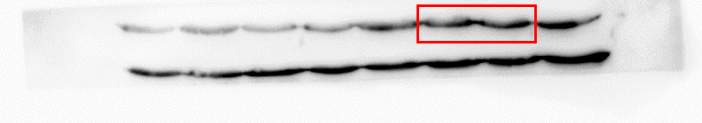

**CREB**

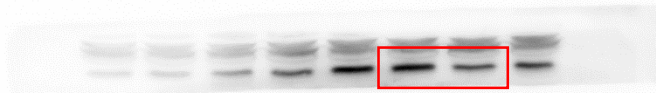

**Phosphor CREB**

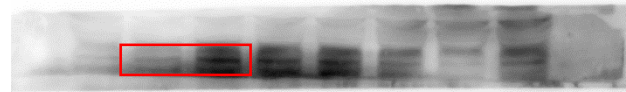



**Fig.S2**

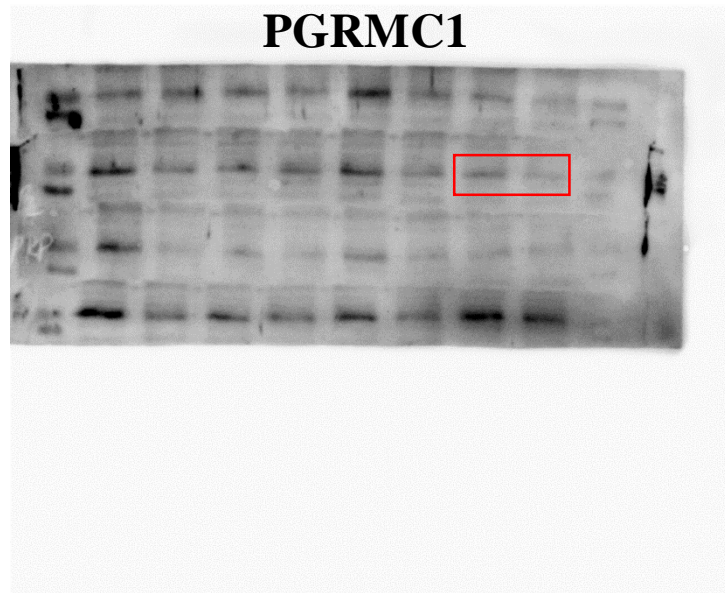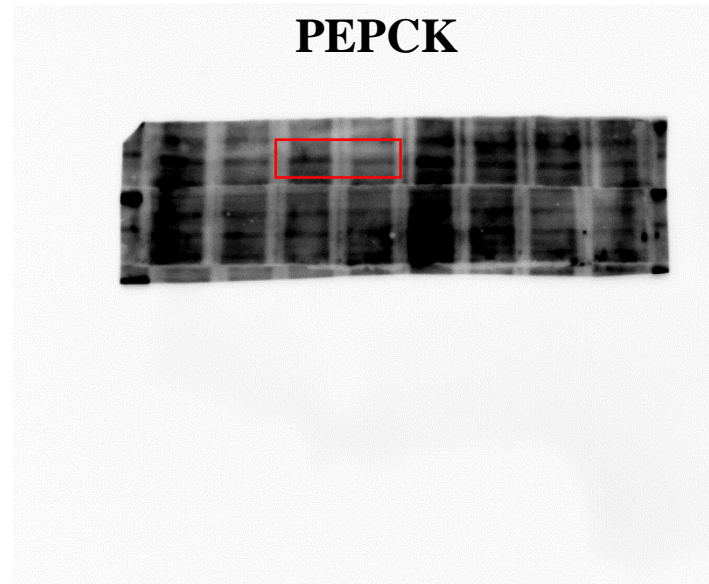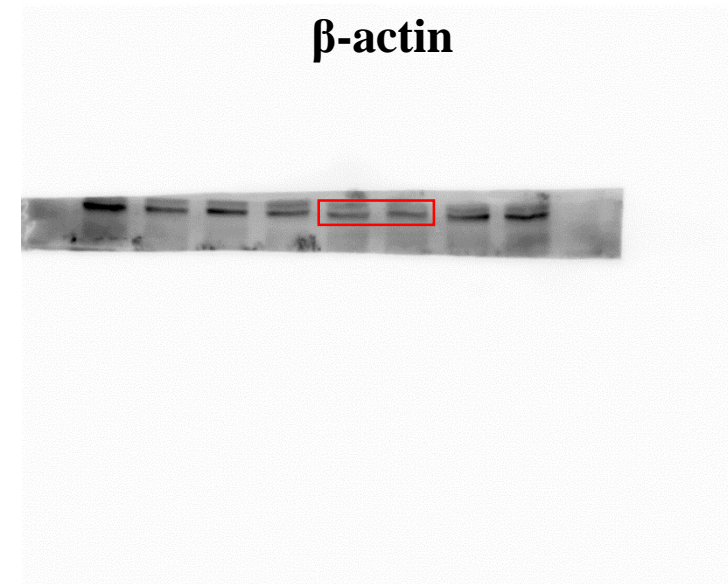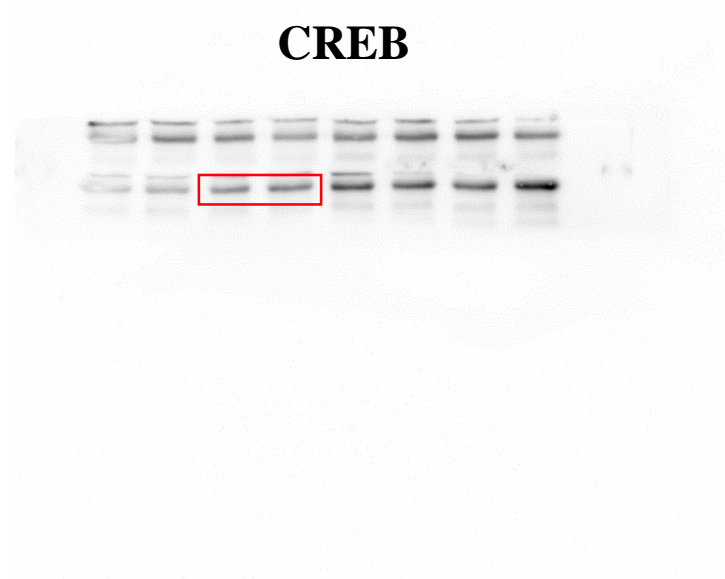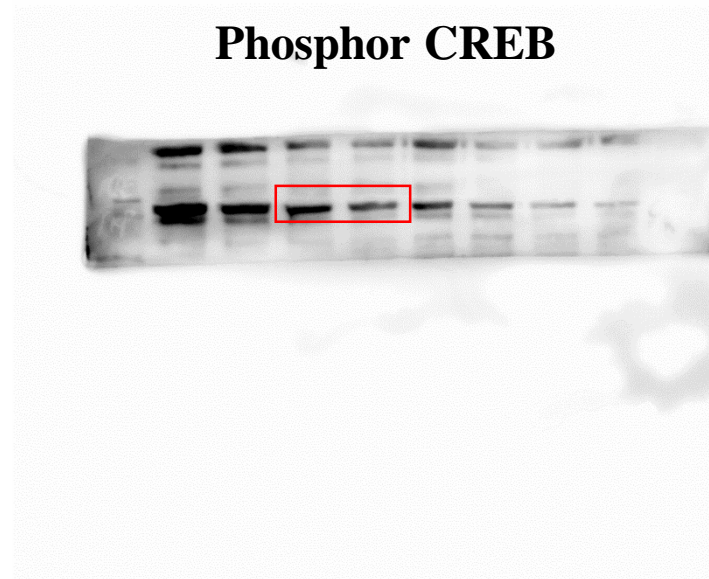

**Fig.S4**

**PGRMC1**

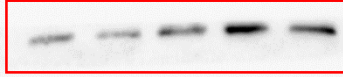

**PEPCK**

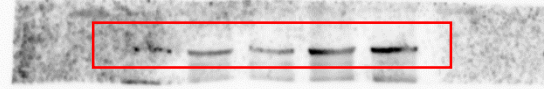

**$\beta$ -actin**

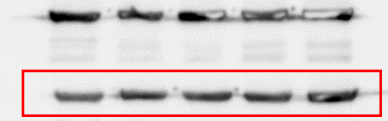

Supplement: 41598_2020_73330_MOESM1_ESM.pdf [file 41598_2020_73330_MOESM1_ESM.pdf]
